# Supplementary material for: Carbon dot incorporated mesoporous silica nanoparticles for targeted cancer therapy and fluorescence imaging
Source: Royal Society of Chemistry journal article supplement (doi:10.1039/d3ra00768e), 2023-01-01
Supplement: d3ra00768e1.pdf [file d3ra00768e1.pdf]

## Carbon dots incorporated mesoporous silica nanoparticles for targeted cancer therapy and fluorescence imaging

Abolghasem Abbasi Kajani<sup>1,\*</sup>, Laleh Rafiee<sup>2</sup>, Shaghayegh Haghjooy Javanmard<sup>2</sup>, Nasim Dana<sup>2</sup>,  
Setareh Jandaghian<sup>2</sup>

<sup>1</sup> Department of Biotechnology, Faculty of Biological Science and Technology, University of Isfahan, Isfahan, 81746-73441, Iran

<sup>2</sup> Applied Physiology Research Center, Cardiovascular Research Institute, Isfahan University of Medical Sciences, Isfahan, 81746-73461, Iran.

\* Corresponding authors:  
[agh.abbasi@bio.ui.ac.ir](mailto:agh.abbasi@bio.ui.ac.ir)

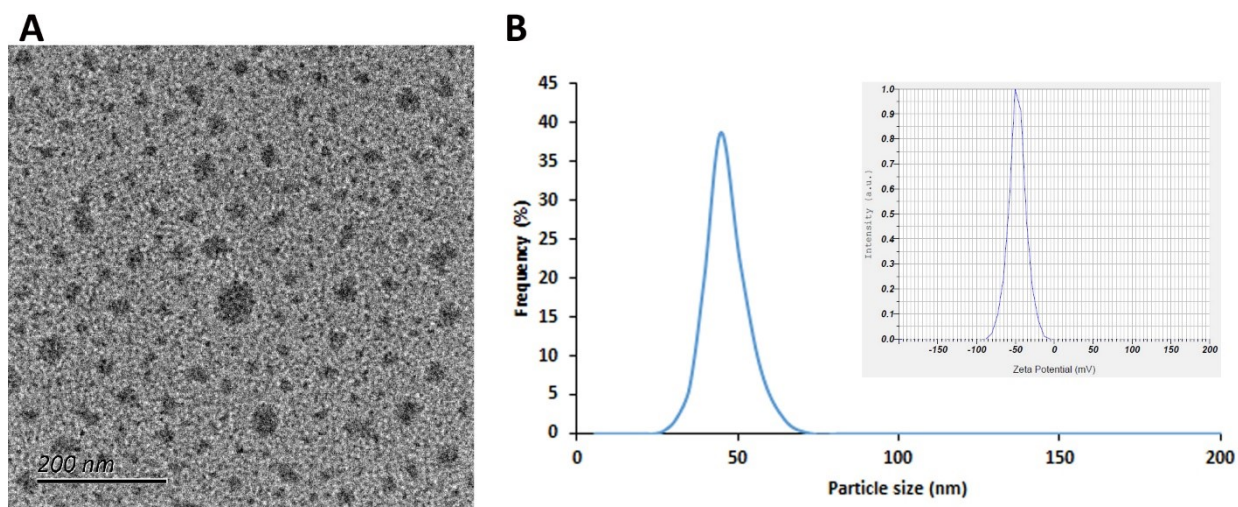

**Fig. S1** The characterization of CDs. The results of HRTEM (A), DLS (B), and  $\zeta$  potential (inset) analysis of CDs.

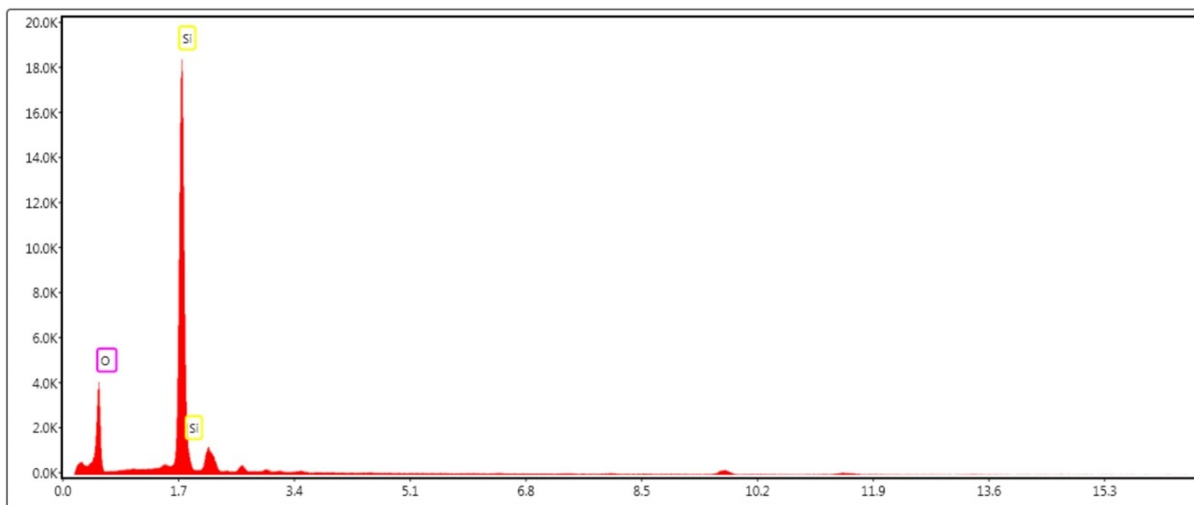

**Fig. S2** The EDS analysis of MSNs.

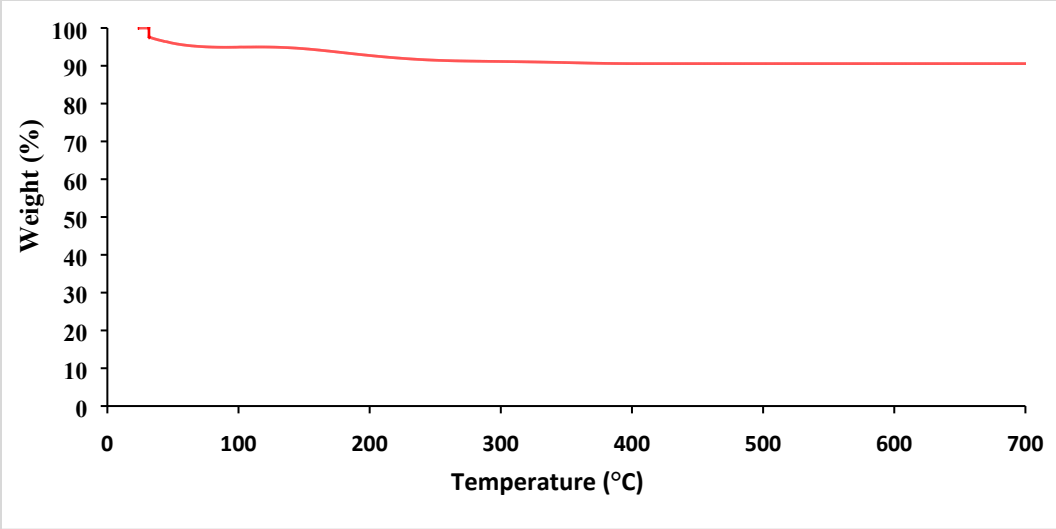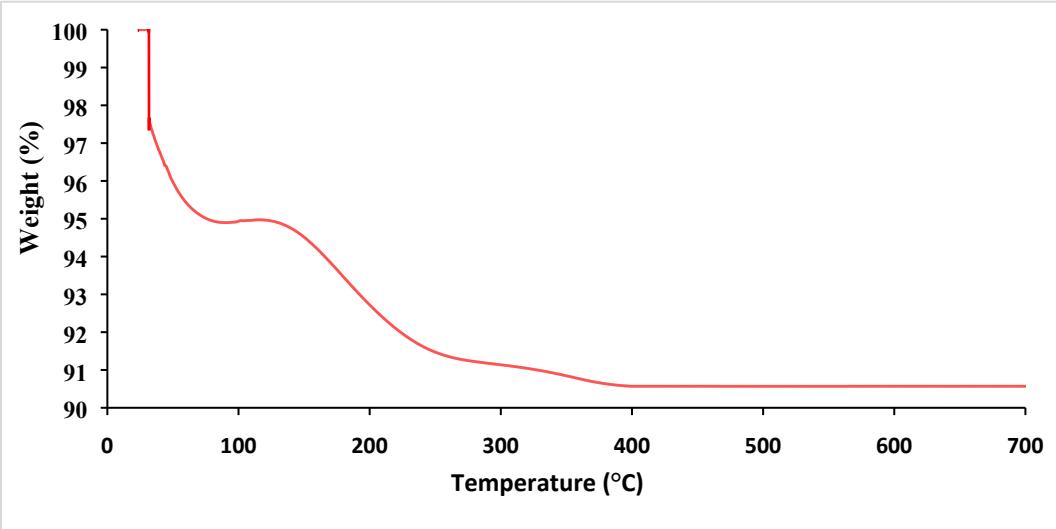

Fig. S3 TGA curve of MSNs-CDs.

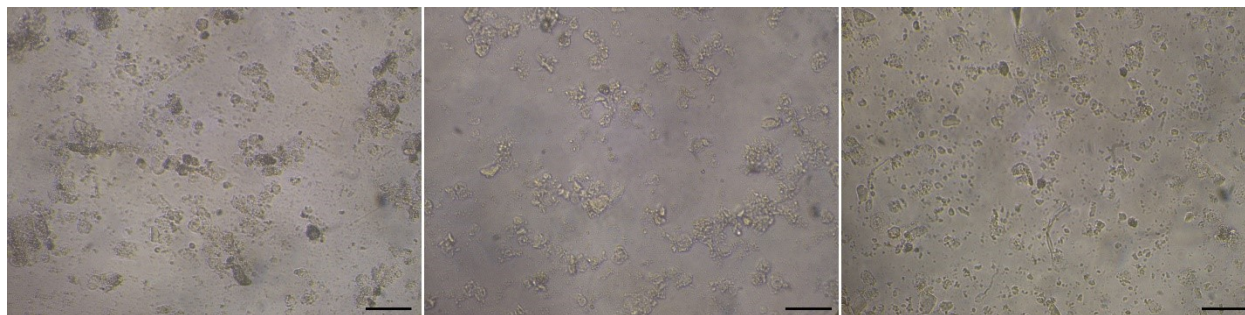

**Fig. S4** Changes in morphology MCF-7, MDA-MB and HUVEC cells after 48 h exposure with  $100 \mu\text{g. mL}^{-1}$  MSNs-CDs (Scale bars =  $50 \mu\text{m}$ ).

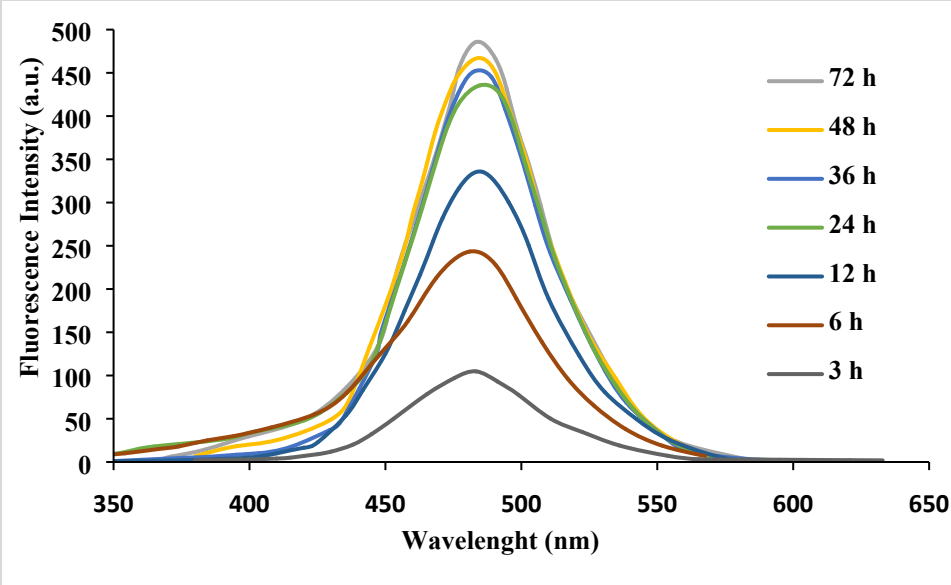

Fig. S5 Fluorescence spectra of the supernatant obtained after incubation of MSNs-CDs in PBS buffer (pH 5.0) for 3, 6, 12, 24, 36, 48, and 72 h.
